# Supplementary material for: Alcohol Consumption during Pregnancy: Analysis of Two Direct Metabolites of Ethanol in Meconium
Source: MDPI journal article supplement (doi:10.3390/ijms17030417), 2016-03-22
Supplement: s1 [file s1]

# Supplementary Materials: Alcohol Consumption during Pregnancy: Analysis of Two Direct Metabolites of Ethanol in Meconium

Arantza Sanvisens, Neus Robert, José María Hernández, Paola Zuluaga, Magí Farré, Wifredo Coroleu, Montserrat Serra, Jordi Tor and Robert Muga

## Appendix A:

**Table S1.** Obstetric characteristics of 51 parturient women admitted to the Obstetric Unit in September 2011 and March 2012.

| Characteristics                          | N = 51 n (%) |
|------------------------------------------|--------------|
| Age (Median (IQR))                       | 30 (26–34)   |
| <b>Obstetric History (TPAL)</b>          |              |
| Number of Term Births (T)                |              |
| 0                                        | 22 (43.1)    |
| 1                                        | 23 (45.1)    |
| 2                                        | 4 (7.9)      |
| 3                                        | 2 (3.9)      |
| Number of Preterm Births (P)             |              |
| 0                                        | 51 (100.0)   |
| Number of Abortions (A)                  |              |
| 0                                        | 36 (70.6)    |
| 1                                        | 9 (17.6)     |
| 2                                        | 4 (7.9)      |
| 3                                        | 2 (3.9)      |
| Number of Living Children (L)            |              |
| 0                                        | 22 (43.1)    |
| 1                                        | 23 (45.1)    |
| 2                                        | 4 (7.9)      |
| 3                                        | 2 (3.9)      |
| <b>Comorbidities</b>                     | 25 (49.0)    |
| <b>Regular pharmacological treatment</b> | 16 (31.4)    |

TPAL: number of term births (T)/number of preterm births (P)/number of abortions (A)/number of living children (L).

**Table S2.** Pregnancy outcomes of 51 parturient women admitted to the Obstetric Unit in September 2011 and March 2012.

| Pregnancy Variables                       | N = 51 n (%) |
|-------------------------------------------|--------------|
| <b>Risk Pregnancy Level (n = 44)</b>      |              |
| No risk                                   | 10 (22.7)    |
| Moderate                                  | 18 (40.9)    |
| High                                      | 16 (36.4)    |
| Very high                                 | 0 (0)        |
| <b>Completed Clinical Visits (n = 41)</b> |              |
| 80%–100%                                  | 31 (75.6)    |
| 51%–79%                                   | 5 (12.2)     |
| ≤50%                                      | 5 (12.2)     |

Table S2. Cont.

| Pregnancy Variables                                            | N = 51 n (%)     |
|----------------------------------------------------------------|------------------|
| <b>Analysis of First Trimester (n = 42), median (IQR)</b>      |                  |
| Haemoglobin ( $\times 10^9/L$ )                                | 11.7 (11.4–12.5) |
| Platelets ( $\times 10^9/L$ )                                  | 217 (190–256)    |
| Ferritin (ng/mL)                                               | 16 (11–28.9)     |
| <b>Ultrasound of First Trimester (n = 39)</b>                  |                  |
| Normal                                                         | 35 (89.7)        |
| Altered                                                        | 4 (10.3)         |
| <b>Weight Increase During Pregnancy (n = 27), median (IQR)</b> | 11.3 (8.4–16.3)  |
| <b>Type of Birth (n = 52 *)</b>                                |                  |
| Eutocic                                                        | 29 (55.7)        |
| Dystocia (forceps, vacuum, other)                              | 9 (17.3)         |
| Caesarean (elective or urgent)                                 | 14 (27.0)        |
| Gestational age in weeks, median (IQR)                         | 40 (38.9–41)     |

\* One of the women gave birth to twins.

Table S3. Characteristics of 52 newborns.

| Characteristics                       | N = 52 n (%)     |
|---------------------------------------|------------------|
| <b>Apgar Test Score at Birth</b>      |                  |
| 8                                     | 3 (5.8)          |
| 9                                     | 47 (90.4)        |
| 10                                    | 2 (3.8)          |
| <b>Apgar Test Score at 5 min</b>      |                  |
| 10                                    | 52 (100.0)       |
| <b>Immediate Birth Complications</b>  |                  |
| No                                    | 50 (96.2)        |
| Yes                                   | 2 (3.8)          |
| <b>Birth weight (g), median (IQR)</b> | 3240 (3050–3675) |

## Appendix B:

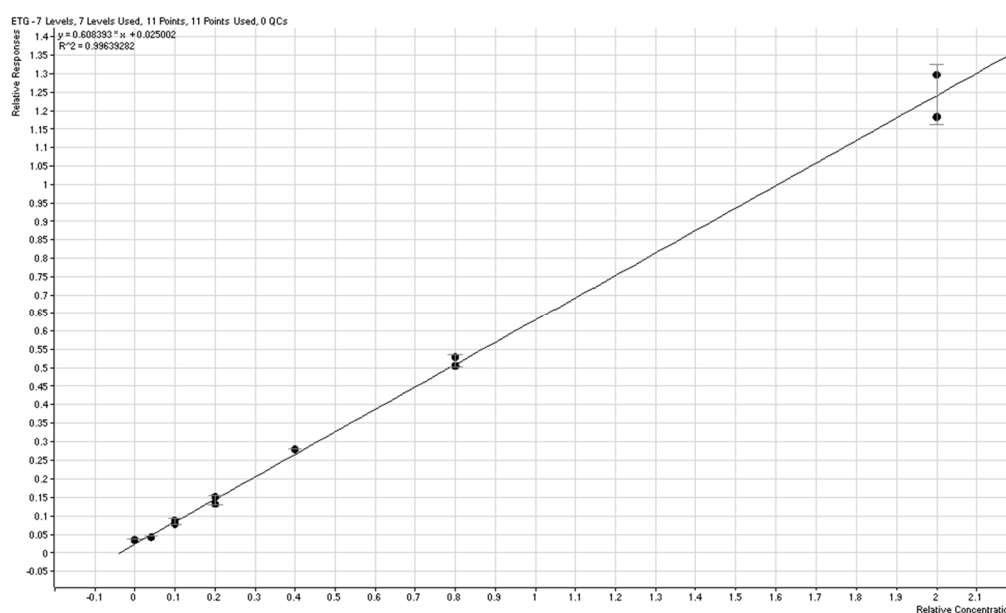

(a) EtG

Figure S1. Cont.

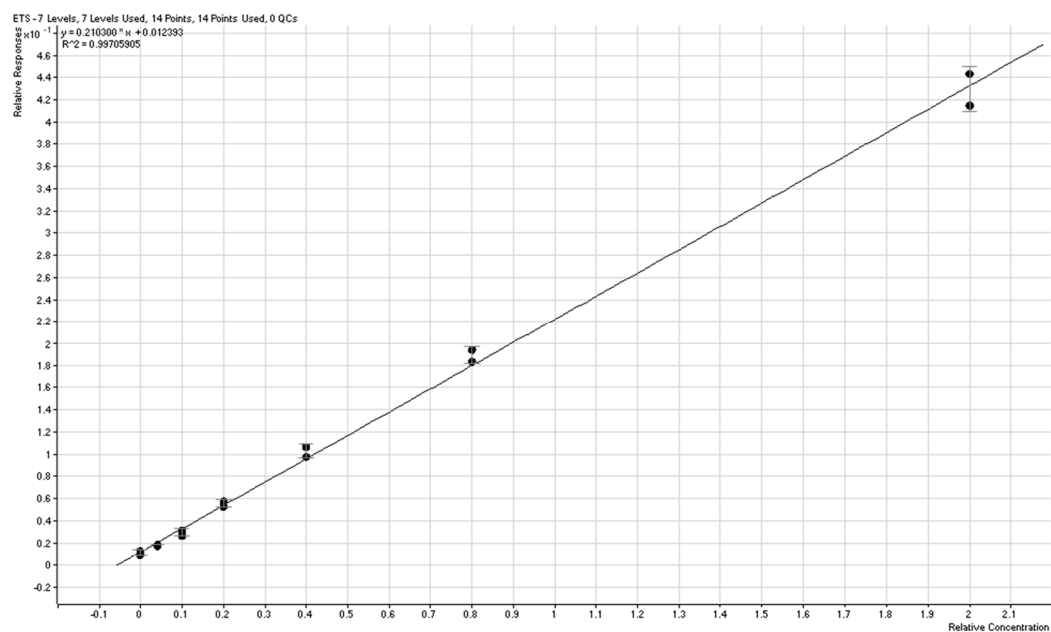

(b) EtS

**Figure S1.** Selected linear calibration curves for EtG (a) and EtS (b).
